# Supplementary figures and images for: Arsenomics of Exiguobacterium sp. PS (NCIM 5463)
Source: Royal Society of Chemistry journal article supplement (doi:10.1039/c3ra40897c), 2013-01-01

## S-II: Peptides Annotations of MS/MS

6803

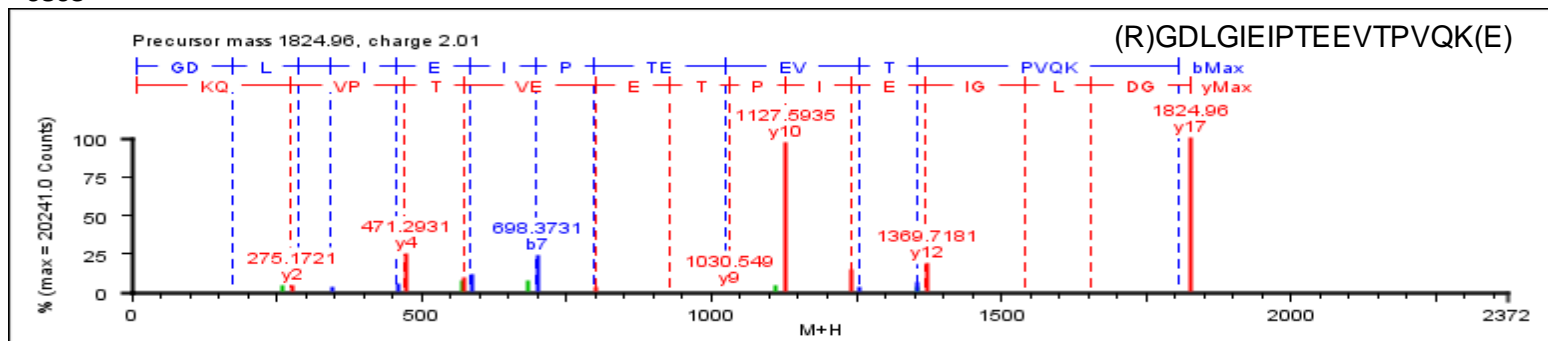

2203

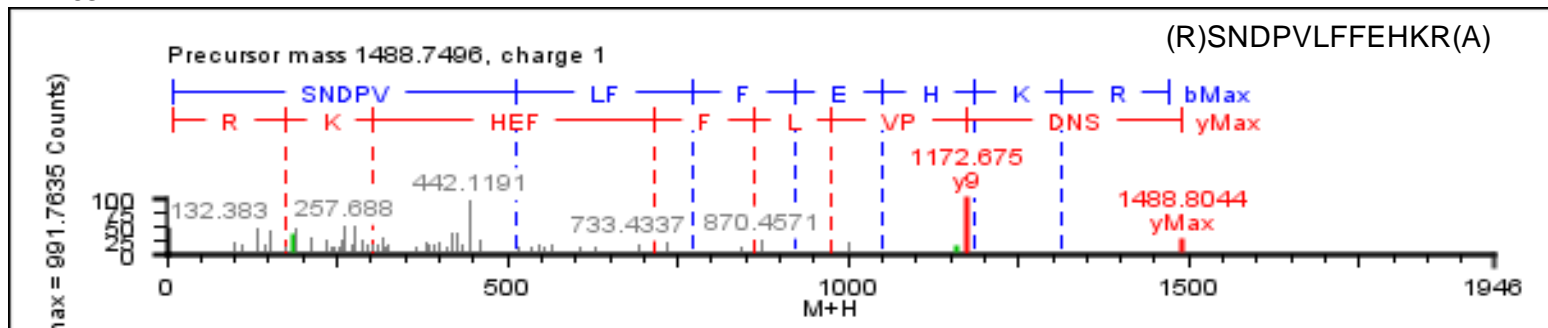

5101

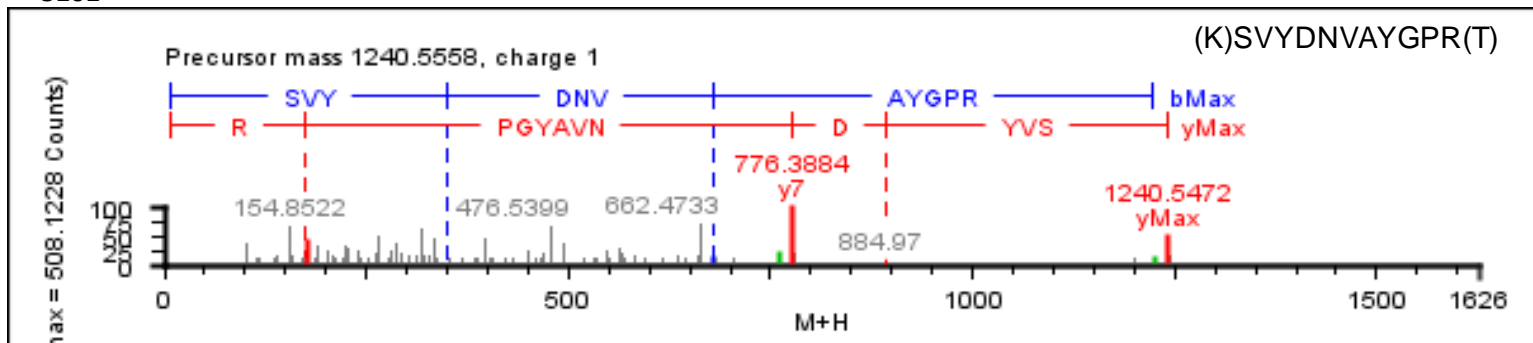

1001

(K)SLDEGQDVEFEIVDGER(G)

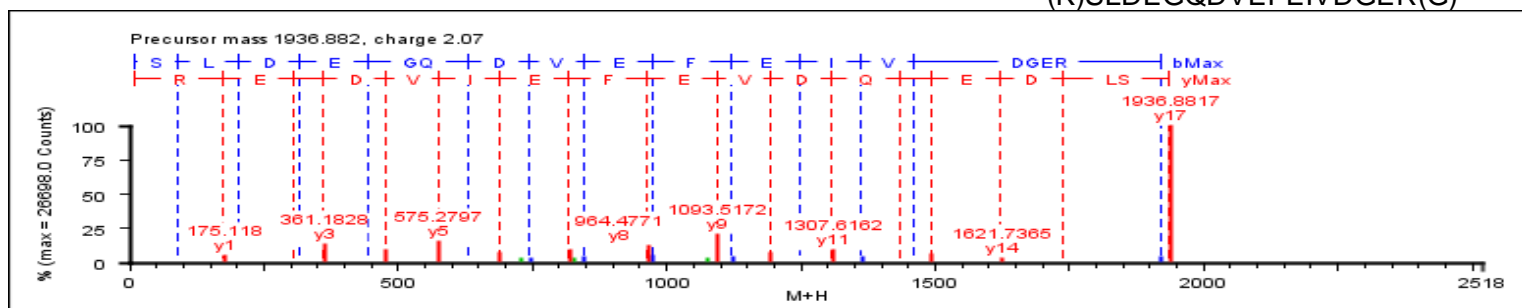

8002

(R)AFETAIDVAIRNEGK(L)

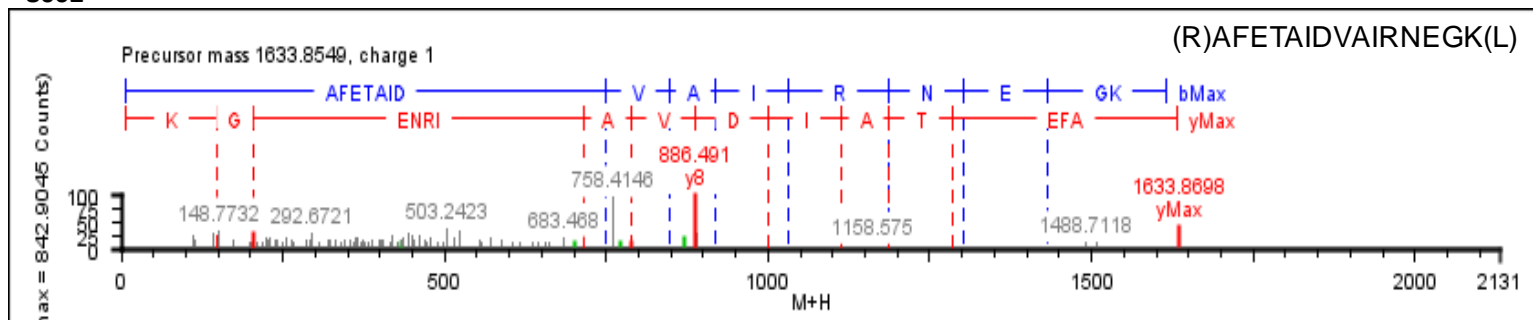

3501

(R)SRRQHAIMK(V)

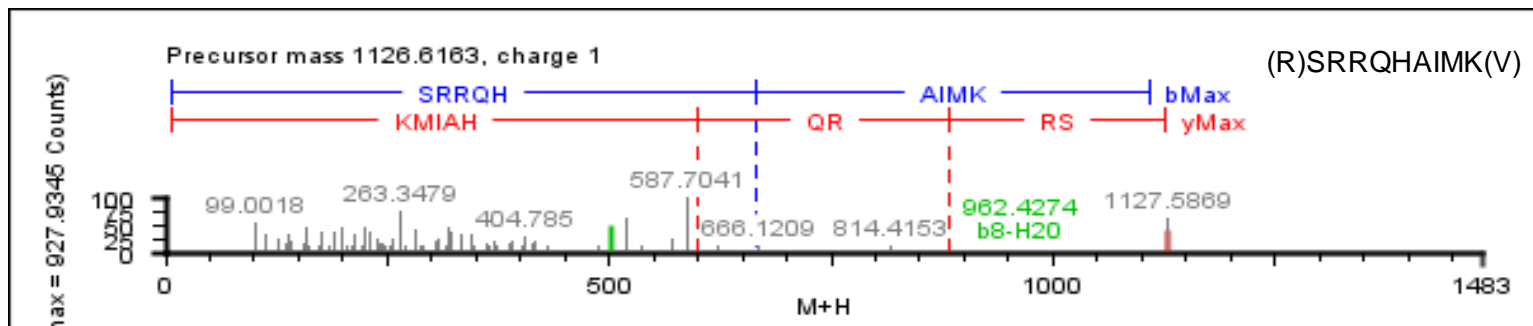

5003

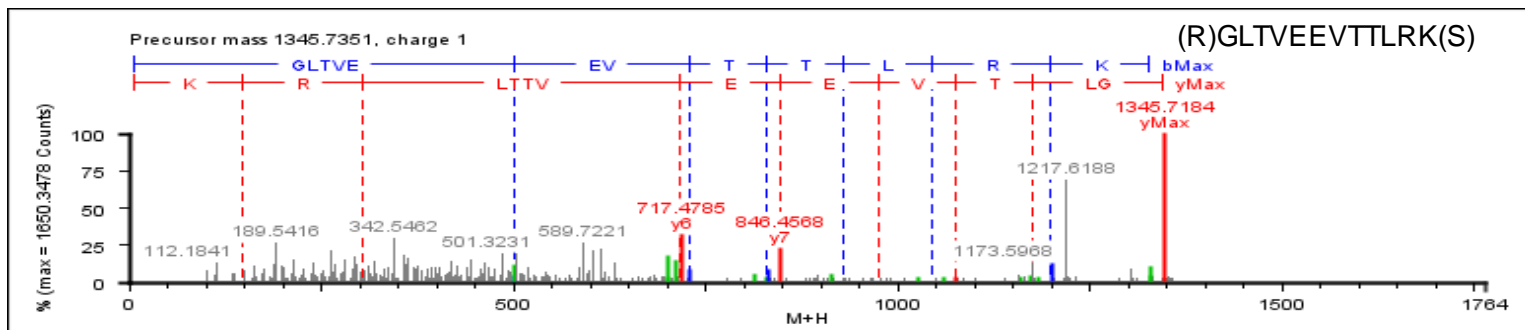

2801

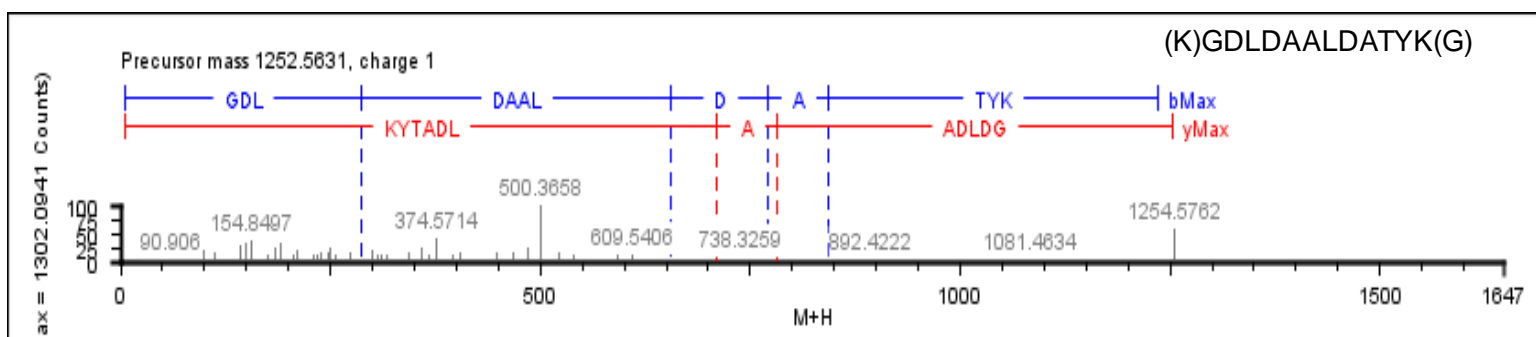

2504

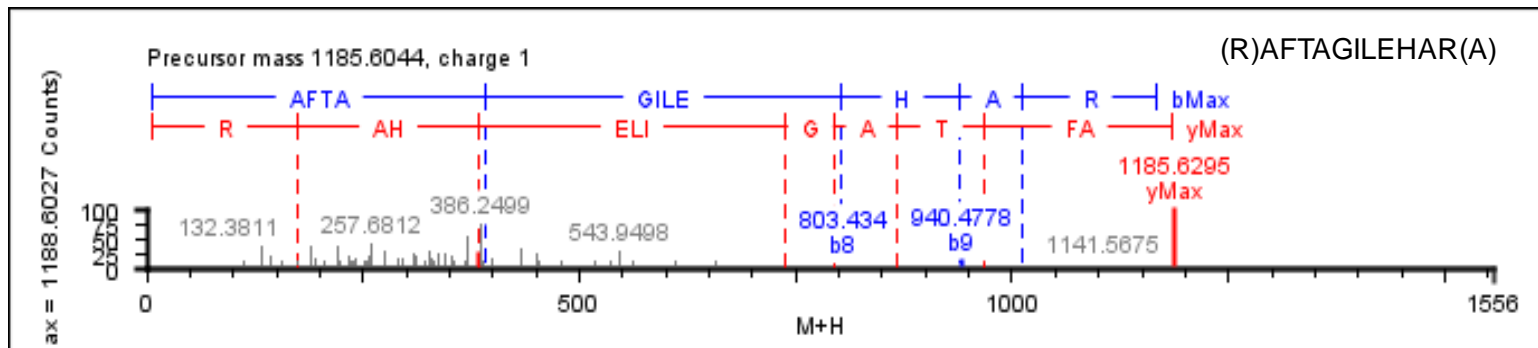

8701

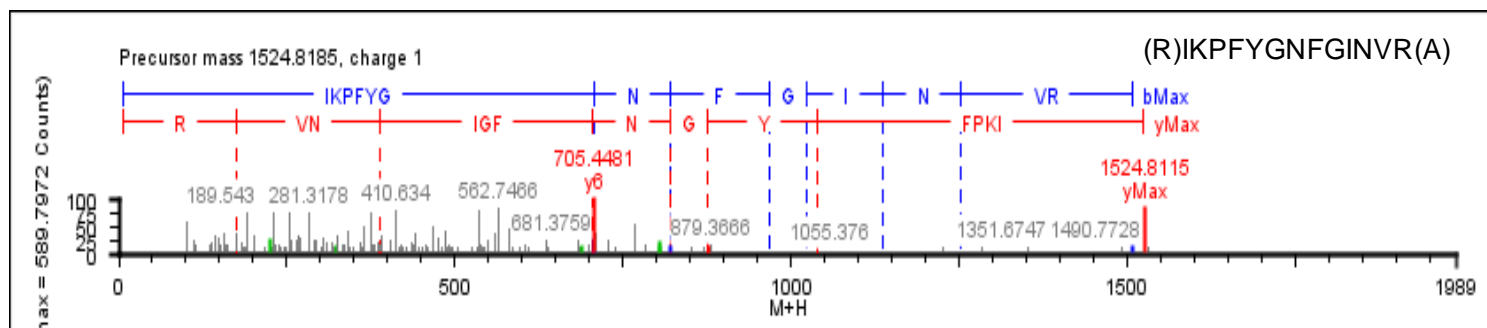

8203

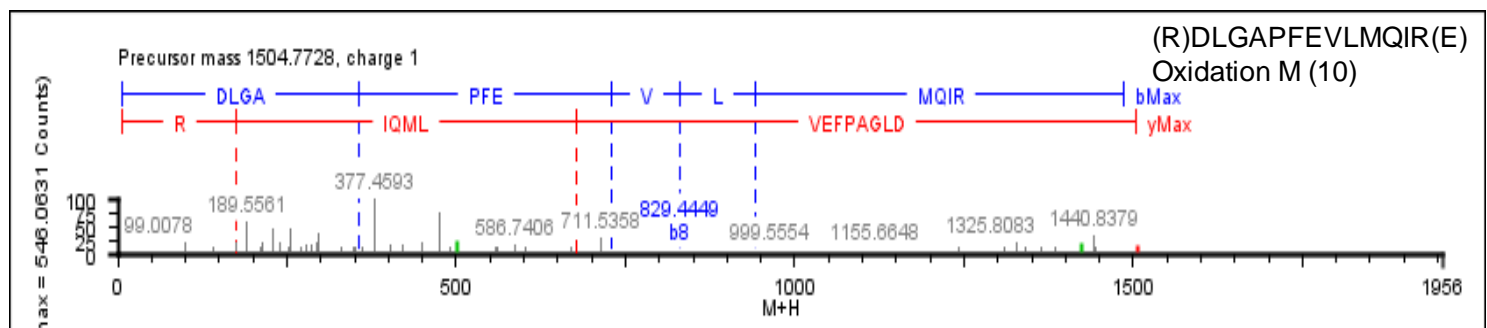

8402

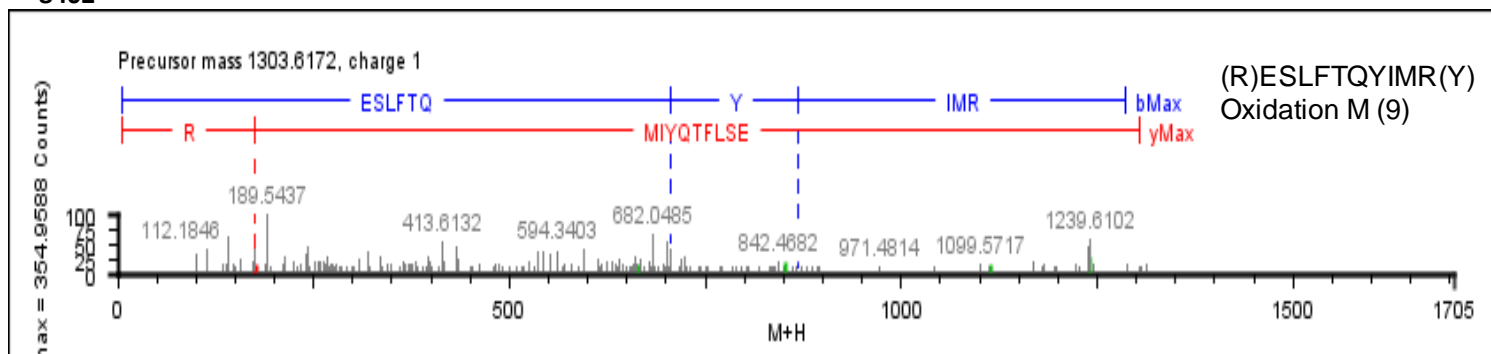

3203

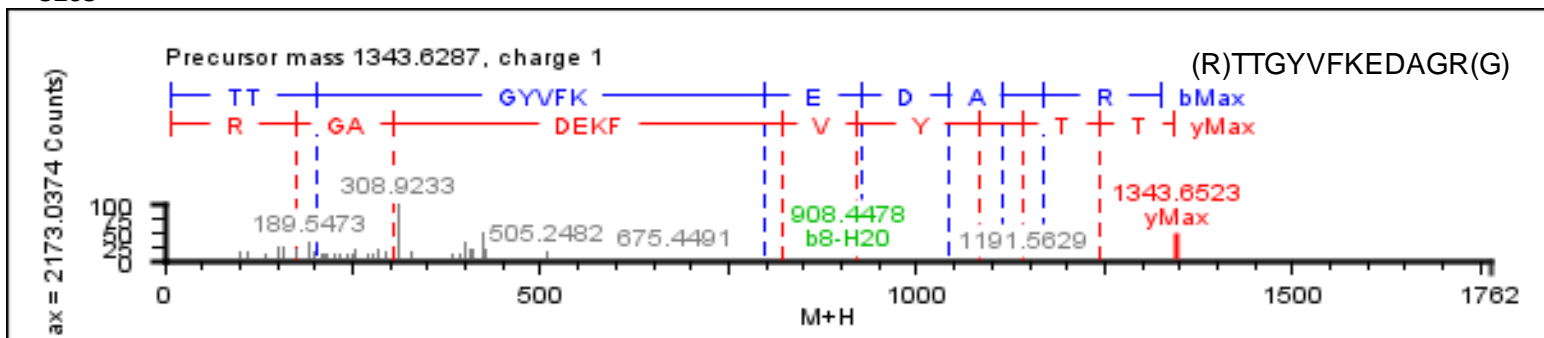

5902

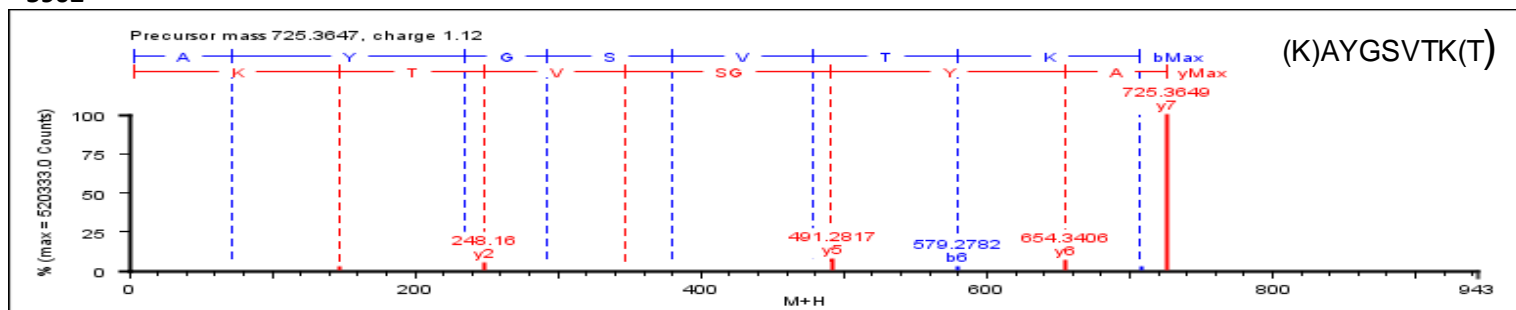

301

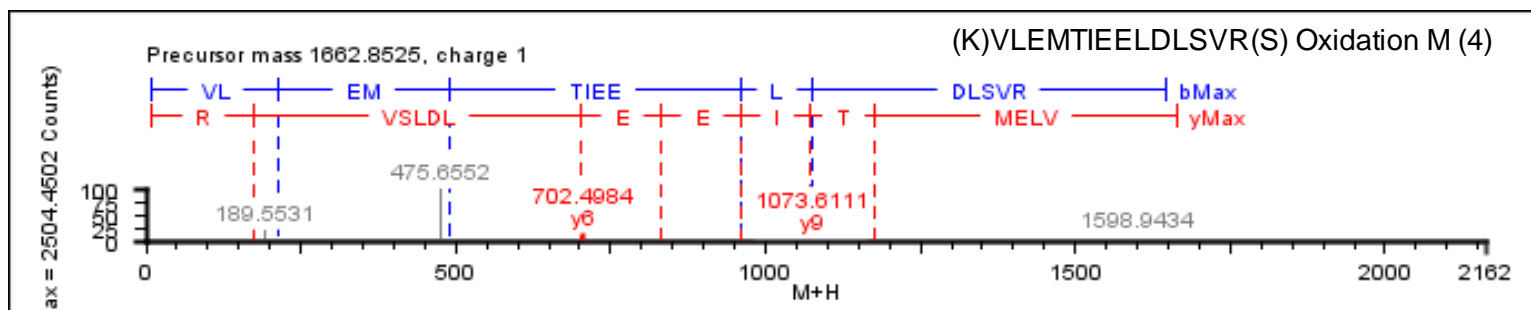

Supplement: c3ra40897c.pdf [file c3ra40897c.pdf]
